# Supplementary material for: Molecular basis for CENP-N recognition of CENP-A nucleosome on the human kinetochore
Source: PubMed Central journal article supplement (PMC5835772; doi:10.1038/cr.2018.13), 2018-01-19
Supplement: cr201813x1.pdf [file cr201813x1.pdf]

1 **Supplementary information, Data S1** Methods and materials

2 **Plasmids**

3 The genes encoding full-length human H2A-H2B and CENP-A-H4 were cloned into pET28K  
4 and pETDuet-1 vector to yield (His)<sub>6</sub>-H2A-H2B/pET28K and (His)<sub>6</sub>-CENP-A-H4/pETDuet-1  
5 plasmids, respectively. The (His)<sub>8</sub>-CENP-N (CENP-N truncations and CENP-N<sup>1-214</sup> mutants)  
6 plasmids were constructed by cloning CENP-N into pET-28a (+) vector. The full-length CENP-  
7 N and CENP-L were cloned into Multi-Bac vector<sup>1</sup> pACEBac1 (Invitrogen) with a (His)<sub>6</sub>-tag  
8 fused to its C-terminus and pIDC, respectively. The two plasmids were then fused by Cre-  
9 LoxP reaction for the expression of CENP-LN complex. For *in vivo* experiments, we cloned  
10 the full-length CENP-N into pEGFP-C2-Linker. Point mutants in CENP-N were generated with  
11 a site-directed mutagenesis polymerase Q5 (NEB). All plasmids were sequenced for  
12 verification.

13 **Protein production**

14 The histone plasmids were co-transformed into *E. coli* Rosetta2 (DE3) cells and plated on agar  
15 containing 50 µg/mL kanamycin and 100 µg/mL ampicillin followed by grown overnight at  
16 37 °C. Picked colonies were inoculated into 5 mL starter culture of Luria-Bertani (LB) medium  
17 and grown with shaking for 3 hours at 37 °C. The starter culture was transferred into 50 mL LB  
18 medium and incubated at 37 °C for another 3 hours. Fifteen-milliliter of the second culture was  
19 transferred into 1L LB medium and incubated at 37 °C to an OD<sub>600</sub> of ~0.5. The culture was  
20 induced with 0.4 mM isopropyl β-D-1-thiogalactopyranoside (IPTG) and incubated at 37 °C  
21 for 12~16 h. Cells were harvested and lysed using high pressure cracker in lysis buffer A (20  
22 mM Tris-HCl, 2 M NaCl, 1 mM β-ME, pH 8.0). The human H2A/H2B/CENP-A/H4 octamer

23 was first purified by nickel-nitriloacetic acid (Ni-NTA) affinity chromatography <sup>2</sup>, and the  
24 (His)<sub>8</sub>-tag was cleaved by TEV protease. The histone octamer was further purified using a  
25 HiLoad Superdex 200 (16/60) (GE Healthcare) column with SEC buffer 1 (20 mM Tris, 2 M  
26 NaCl, 1 mM DTT, pH 8.0), and the peaks corresponding to histone octamer were assessed by  
27 SDS-PAGE. Purified histone octamers were wrapped with 147 base pair ‘Widom 601’ DNA  
28 fragment to reconstitute CENP-A NCP by dialysis <sup>3</sup>. The reconstituted NCP was further purified  
29 by 60 mL 5% Native-PAGE in Model 491 Prep Cell (Bio-Rad Laboratories) according to the  
30 instruction manual in 0.2 x TBE at 10 °C and at a power of 5 W running for 4 hours. Using TCS  
31 buffer (20mM Tris-HCl, 1mM EDTA, 1mM DTT, pH7.5) as an elution buffer. The peak  
32 fractions measured by UV detector at 254nm were analyzed by 15% SDS-PAGE and 5%  
33 Native-PAGE (Figure S1A-S1C).

34 The plasmids of CENP-N truncations or mutants were transformed into *E. coli* BL21(DE3) RIL  
35 (Novagen) cells and grown overnight at 37 °C in a 50 mL starter culture of Luria-Bertani (LB)  
36 media containing 50 µg/mL kanamycin. Ten milliliter overnight starter culture was transferred  
37 into 1 L LB medium and incubated at 37 °C to an OD<sub>600</sub> of ~0.6–0.8. The culture was induced  
38 with 0.4 mM IPTG and incubated for ~20 hours at 16 °C. Cells were harvested by centrifugation  
39 and lysed using high pressure cracker in a lysis buffer B (50 mM Tris-HCl, 500 mM NaCl, 5  
40 mM Imidazole, 5% Glycerol, pH 7.5). The N-terminal (His)<sub>8</sub>-tagged protein was first purified  
41 by nickel-nitriloacetic acid (Ni-NTA) affinity chromatography and further purified using a  
42 Superdex 200 (10/300) increase (GE Healthcare) column with SEC buffer 2 (20 mM Tris, 500  
43 mM NaCl, 2% glycerol, 1 mM DTT, pH 7.5), and the peaks corresponding to CENP-N were  
44 assessed by 15% SDS-PAGE (Figure S9).

45 The CENP-LN complex was expressed in Sf21 insect cells for 48 hours and purified in the  
46 same way as CENP-N truncations (Figure S1D-S1E).

47 The CENP-A NCP/CENP-LN complex was obtained by mixing purified CENP-A NCP and  
48 CENP-LN complex with a 1:1.5 molar ratio in SEC buffer 3 (20mM Tris-HCl, 50 mM NaCl,  
49 1mM DTT, pH7.5) at 4 °C for 30 minutes followed by gel filtration with a Superose6 (10/300)  
50 (GE Healthcare) column. The peaks corresponding to CENP-A NCP/CENP-LN complex was  
51 assessed by 5% Native-PAGE and 15% SDS-PAGE and concentrated for cryo-EM grid  
52 preparation (Figure S2).

### 53 **EM grid preparation and data collection**

54 For cryo-EM sample preparation, an aliquot of 2.5µl fresh sample of concentration 0.2~0.3  
55 mg/ml (measured by SAM 4000 at 260 nm) was applied to a glow-discharged holey carbon grid  
56 (Quantifoil, R1.2/1.3, 300 mesh). The grid was blotted for 6s under 100% humidity at room  
57 temperature (20 °C), and plunged into liquid ethane cooled by liquid nitrogen with an FEI  
58 Vitrobot (FEI Company). The grids were evaluated in an FEI Tecnai F20 (TF20) microscopy  
59 operating at 200 kV with an FEI Eagle's camera. Good grids were stored in a liquid nitrogen  
60 dewar for high resolution imaging.

61 A combination of TF20 and Titan Krios cryo electron microscopes, both equipped with a Gatan  
62 K2 Summit camera, were used for data collection. For the TF20 dataset, movies were acquired  
63 by *SerialEM*<sup>4</sup> in counting mode with an under-focus range of 1.2~2.5 µm and nominal  
64 magnification of 29,000×, corresponding to a pixel size of 1.25 Å at the specimen level. Each  
65 movie was dose-fractionated to 40 frames with 0.15s exposure time per frame. With a dose rate  
66 of ~12 counts per physical pixel per second, the total dose was ~46 electrons/Å<sup>2</sup>. For Titan

67 Krios, the cryo-EM data were collected by *Leginon*<sup>5</sup> with the under-focus range of 1.5~2.5 $\mu$ m  
68 and at a nominal magnification of 130,000 $\times$  in super resolution mode, corresponding to a pixel  
69 size of 0.535  $\text{\AA}$  on the sample level. The dose rate was set to be 7 electrons per physical pixel  
70 per second and the total exposure time for each movie was 9 s, fractioned to 45 frames (200 ms  
71 per frame), resulting in a total dose of 55 electrons/ $\text{\AA}^2$ .

72

### 73 **Image processing**

74 The TF20 and Titan datasets were separately processed at beginning and combined for the final  
75 refinement. For TF20 data, movie frames were motion-corrected by *MotionCorr2*<sup>6</sup> program,  
76 generating two datasets summing from all frames or frame 2-21, respectively. The former  
77 dataset was used for Contrast transfer function (CTF) estimation, particle picking and initial  
78 two-dimensional (2D) classifications, while the latter for further 2D and three dimensional (3D)  
79 analysis. *Gctf*<sup>7</sup> was employed to determine defocus parameters. Motion-corrected micrographs  
80 were evaluated and selected according to the ice and drift conditions. Particle picking and the  
81 following 2D and 3D classifications and refinements were all carried out in *Relion2.0*<sup>8,9</sup>. After  
82 particle sorting and two rounds of 2D classifications, 583,653 particles from 3,250 micrographs  
83 were subjected to 3D analysis. Cryo-EM structure of the nucleosome containing H2B-K34Ub<sup>10</sup>  
84 was low-pass filtered to 50  $\text{\AA}$  and used as the initial model for 3D classifications and  
85 refinements. A round of 3D classification into 6 classes yielded 2 reasonable reconstructions  
86 (class 3 and class 4, 124,103 and 128,042 particles respectively). Refinement of class 3  
87 generated a partially unpacked CENP-A NCP/CENP-LN complex at 7.5  $\text{\AA}$  (not shown), while  
88 class 4 yielded an intact reconstruction of the complex at an average resolution of 6.4  $\text{\AA}$ .

89 To improve the resolution of the interfaces, focused refinement on CENP-LN density was  
90 carried out. The additional 3D classification yielded 2 good classes with better density for  
91 CENP-N. The corresponding 79,797 particles were refined and an improved reconstruction was  
92 obtained, at an average resolution of 6.2 Å according to the “gold-standard” Fourier shell  
93 correlation (FSC) 0.143 criterion. Local resolution was estimated with *ResMap*<sup>11</sup>.

94 For the Titan Krios dataset, frames were motion-corrected and binned over  $2 \times 2$  by  
95 *MotionCorr2*, generating summed or dose weighted micrographs with a pixel size of 1.07 Å.  
96 Summed micrographs were used for CTF estimation, particle picking and initial 2D  
97 classification, and dose weighted data for further 2D and 3D classifications or refinements. CTF  
98 parameters was estimated by *ctffind4*<sup>12</sup>. Micrographs were manually evaluated and those with  
99 ice contamination or severe drift were discarded. All subsequent analysis was performed with  
100 *Relion2.1*<sup>8,9</sup>. Due to the preferred orientation distribution, two rounds of particle picking were  
101 carried out using different templates that facilitated top view and side-view particle picking  
102 respectively. After particle sorting and 2D classifications 88,227 top view and 136,077 side  
103 view particles from 3,062 micrographs were qualified for further 3D analysis. A round of 3D  
104 classification into 6 classes with TF20 CENP-A NCP/CENP-LN complex reconstruction as the  
105 starting model (low pass filtered to 40 Å) yielded a promising intact complex structure (class 5,  
106 refined from 50,801 particles). The subsequent refinement reached an average resolution of 5.6  
107 Å.

108 In the end the two datasets were combined to generate the final reconstruction. TF20 particles  
109 was rescaled in Fourier space to a pixel size of 1.07 Å, based on the calibrated pixel size by  
110 calculating the final reconstructions’ cross-correlation coefficients in *UCSF Chimera*<sup>13</sup>. Masked

111 refinement of merged particles generated the final reconstruction with improved resolution for  
112 CENP-N.

113 The final resolution was reported 5.8 Å based on the 0.143 FSC criterion. Local resolution was  
114 estimated by *ResMap*<sup>11</sup>. The 5.8 Å structure was analyzed and interpreted in this paper.

### 115 **Modelling**

116 The atomic models of Widom 601 DNA (PDB ID: 4X23)<sup>14</sup>, H2A/H2B/CENP-A/H4 octamer  
117 histones (PDB ID: 3AN2)<sup>15</sup> were fitted into the 3D density maps using *UCSF Chimera*<sup>13</sup>,  
118 yielding a composite atomic model for the CENP-A NCP.

119 Five long (20 Å) and 1~3 short (13 Å) helices and a central β sheet were clearly resolved in our  
120 cryo-EM map of CENP-N<sup>N</sup> (orange in Figure 1A and C). These secondary structures correspond  
121 to secondary structures predicted by *PSIPRED*<sup>16</sup> based on the amino-acid sequence of CENP-  
122 N<sup>N</sup>. A polyalanine helix model was built with *Coot*<sup>17</sup> based on each helix density resolved in  
123 our cryo-EM map of CENP-N<sup>N</sup>. The NCP-distal density has no interaction with NCP was  
124 docked with yeast Chl4<sup>C</sup>/Iml3 (PDB ID: 4JE3)<sup>18</sup> corresponding with the CENP-LN<sup>C</sup>. All figures  
125 were prepared with *UCSF Chimera*.

### 126 **Gel shift assays**

127 The interactions of CENP-LN or CENP-N truncations and mutants with CENP-A NCP were  
128 analyzed by 5% Native-PAGE gel electrophoresis. Three microliters of CENP-A NCP (~0.77  
129 μM) was mixed with different amounts of CENP-LN (Figure S2A), CENP-N truncations  
130 (Figure S6A-S6C) or mutants (Figure 1F) in SEC buffer 3 for 30~60 minutes at 4 °C prior to  
131 Native-PAGE gel electrophoresis.

132 The interactions between CENP-N truncations and mutants with 147 bp DNA were analyzed  
133 by 1.5% native agarose gel electrophoresis (Figure 1G) or 5% Native-PAGE gel electrophoresis  
134 (Figure S6D). One microliter (Figure 1G) or four microliters (Figure S6D) of 0.37  $\mu$ M 147 bp  
135 DNA were incubated with CENP-N<sup>1-214</sup> or its mutants in different amounts for 30 minutes at  
136 4 °C in 20 mM Tris-HCl, 350 mM NaCl, 1 mM DTT, pH 7.5.

### 137 **Cell culture, synchronization and transfection**

138 HeLa cells, from American Tissue Culture Collection, were maintained as subconfluent  
139 monolayers in Dulbecco's modified Eagle's medium (DMEM, Gibco) with 10% (vol/vol) fetal  
140 bovine serum (FBS; Hyclone) and 100 units/mL penicillin plus 100  $\mu$ g/mL streptomycin (Gibco)  
141 at 37 °C with 5% CO<sub>2</sub>. For cell synchronization, aliquots of HeLa cells were synchronized at  
142 G1/S with 2.5 mM thymidine (Sigma-Aldrich) for 16 h, washed with PBS three times, and then  
143 cultured in thymidine-free medium for appropriate time intervals.

### 144 **siRNA**

145 CENP-N siRNAs (Dharmacon, M-015872-02-0005) were used according to the manufacturer's  
146 instructions. Buffer alone was used in control experiments. All the siRNAs or constructs were  
147 transfected into HeLa cells with Lipofectamine 3000 (Invitrogen) following the manufacturer's  
148 protocol.

### 149 **Antibodies**

150 For immunofluorescence assay, the following antibodies were used: ACA (anti-centromere  
151 antibodies, gift from Don W. Cleveland, University of California at San Diego), rabbit anti-  
152 CENP-A (2186, Cell Signaling Technology), rabbit anti-CENP-N (PA5-65747, Invitrogen) and  
153 rabbit anti-CENP-L (PA5-60736, Invitrogen). Antibody against CENP-E (HpX) were generated

154 as described previously<sup>19, 20</sup>. Secondary antibodies were purchased from Jackson  
155 ImmunoResearch.

### 156 **Immunofluorescence and live cell imaging**

157 HeLa cells transfected with CENP-N siRNA were rinsed for 1 min with PHEM buffer (100 mM  
158 PIPES, 20 mM HEPES, pH 6.9, 5 mM EGTA, 2 mM MgCl<sub>2</sub>, and 4 M glycerol) and  
159 permeabilized for 1 min with PHEM plus 0.1% Triton X-100 as described previously<sup>21</sup>.  
160 Extracted cells were then fixed using PHEM buffer supplemented with 3.7% paraformaldehyde.  
161 After blocking with 1% bovine serum albumin (Sigma-Aldrich) in PBST (PBS with 0.05%  
162 Tween-20) buffer for 45 min at room temperature, the fixed cells were incubated with primary  
163 antibodies in a humidified chamber for 1 hour followed by secondary antibodies for 1 hour at  
164 room temperature. The DNA was stained with DAPI (Sigma-Aldrich). Images were acquired  
165 by DeltaVision softWoRx software (Applied Precision) and processed by deconvolution and z-  
166 stack projection.

167 For live cell imaging, HeLa cells transfected with CENP-N siRNA and constructs of GFP-  
168 CENP-N wild type or K10A mutant were cultured in glass-bottom culture dishes (MatTek) and  
169 maintained in CO<sub>2</sub>-independent media (Gibco) supplemented with 10% (vol/vol) FBS and 2  
170 mM glutamine<sup>22</sup>. During imaging, the dishes were placed in a sealed chamber at 37 °C. Images  
171 of living cells were taken with a DeltaVision microscopy system (Applied Precision Inc.).  
172 Image processing was performed with SoftWoRx (Applied Precision Inc.). To trace  
173 chromosomes in mitosis, frames were collected at 3-5 min intervals. Images were prepared for  
174 publication using Adobe Photoshop software.

### 175 **Fluorescence intensity quantification**



176 Quantification of fluorescence intensity of kinetochore-associated proteins was performed as  
177 described previously using ImageJ (NIH)<sup>23</sup>. In brief, the average pixel intensities from no less  
178 than five cells (which were randomly selected) were measured, and background pixel intensities  
179 were subtracted. The pixel intensities at each kinetochore pair were then normalized against  
180 ACA values to account for any variations in staining or image acquisition.

### 181 **Statistics**

182 Two-sided unpaired Student's *t*-test was applied for experimental comparisons, using GraphPad  
183 Prism. Differences were considered significant when  $p < 0.05$ .

184

185

186 **Reference:**

- 187 1 Bieniossek C, Imasaki T, Takagi Y, Berger I. MultiBac: expanding the research toolbox for multiprotein  
188 complexes. *Trends in biochemical sciences* 2012; **37**:49-57.
- 189 2 Shim Y, Duan MR, Chen X, Smerdon MJ, Min JH. Polycistronic coexpression and nondenaturing  
190 purification of histone octamers. *Analytical biochemistry* 2012; **427**:190-192.
- 191 3 Dyer PN, Edayathumangalam RS, White CL *et al.* Reconstitution of nucleosome core particles from  
192 recombinant histones and DNA. *Methods in enzymology* 2004; **375**:23-44.
- 193 4 Mastronarde DN. Automated electron microscope tomography using robust prediction of specimen  
194 movements. *J Struct Biol* 2005; **152**:36-51.
- 195 5 Suloway C, Pulokas J, Fellmann D *et al.* Automated molecular microscopy: The new Legion system. *J*  
196 *Struct Biol* 2005; **151**:41-60.
- 197 6 Zheng SQ, Palovcak E, Armache JP, Verba KA, Cheng YF, Agard DA. MotionCor2: anisotropic  
198 correction of beam-induced motion for improved cryo-electron microscopy. *Nat Methods* 2017;  
199 **14**:331-332.
- 200 7 Zhang K. Gctf: Real-time CTF determination and correction. *J Struct Biol* 2016; **193**:1-12.
- 201 8 Scheres SHW. A Bayesian View on Cryo-EM Structure Determination. *J Mol Biol* 2012; **415**:406-418.
- 202 9 Kimanius D, Forsberg BO, Scheres SHW, Lindahl E. Accelerated cryo-EM structure determination with  
203 parallelisation using GPUs in RELION-2. *Elife* 2016; **5**.
- 204 10 Li JB, He QQ, Liu YT *et al.* Chemical Synthesis of K34-Ubiquitylated H2B for Nucleosome  
205 Reconstitution and Single-Particle Cryo-Electron Microscopy Structural Analysis. *Chembiochem* 2017;  
206 **18**:176-180.
- 207 11 Kucukelbir A, Sigworth FJ, Tagare HD. Quantifying the local resolution of cryo-EM density maps. *Nat*  
208 *Methods* 2014; **11**:63-65.
- 209 12 Rohou A, Grigorieff N. CTFFIND4: Fast and accurate defocus estimation from electron micrographs.  
210 *J Struct Biol* 2015; **192**:216-221.
- 211 13 Pettersen EF, Goddard TD, Huang CC *et al.* UCSF chimera - A visualization system for exploratory  
212 research and analysis. *J Comput Chem* 2004; **25**:1605-1612.
- 213 14 Kato H, Jiang JS, Zhou BR *et al.* A Conserved Mechanism for Centromeric Nucleosome Recognition  
214 by Centromere Protein CENP-C. *Science* 2013; **340**:1110-1113.
- 215 15 Tachiwana H, Kagawa W, Shiga T *et al.* Crystal structure of the human centromeric nucleosome  
216 containing CENP-A. *Nature* 2011; **476**:232-235.
- 217 16 McGuffin LJ, Bryson K, Jones DT. The PSIPRED protein structure prediction server. *Bioinformatics*  
218 2000; **16**:404-405.
- 219 17 Emsley P, Cowtan K. Coot: model-building tools for molecular graphics. *Acta Crystallogr D* 2004;  
220 **60**:2126-2132.
- 221 18 Hinshaw SM, Harrison SC. An Iml3-Chl4 heterodimer links the core centromere to factors required  
222 for accurate chromosome segregation. *Cell reports* 2013; **5**:29-36.
- 223 19 Yen TJ, Li G, Schaar BT, Szilak I, Cleveland DW. CENP-E is a putative kinetochore motor that  
224 accumulates just before mitosis. *Nature* 1992; **359**:536-539.
- 225 20 Yao X, Anderson KL, Cleveland DW. The microtubule-dependent motor centromere-associated  
226 protein E (CENP-E) is an integral component of kinetochore corona fibers that link centromeres to  
227 spindle microtubules. *The Journal of cell biology* 1997; **139**:435-447.
- 228 21 Dou Z, Liu X, Wang W *et al.* Dynamic localization of Mps1 kinase to kinetochores is essential for

229 accurate spindle microtubule attachment. *Proceedings of the National Academy of Sciences of the*  
230 *United States of America* 2015; **112**:E4546-4555.

231 22 Ding X, Yan F, Yao P *et al.* Probing CENP-E function in chromosome dynamics using small molecule  
232 inhibitor syntelin. *Cell Res* 2010; **20**:1386-1389.

233 23 Mo F, Zhuang X, Liu X *et al.* Acetylation of Aurora B by TIP60 ensures accurate chromosomal  
234 segregation. *Nature chemical biology* 2016; **12**:226-232.

235

236

237 **Supplementary Table and Figures:**238 **Table S1:** UniProt Entries of the protein sequences used for sequence alignments.

239

| <b>Figure</b>          | <b>Species</b>                   | <b>UniProt Entry</b> |
|------------------------|----------------------------------|----------------------|
| <b>S5A</b>             | <i>Homo sapiens</i>              | P49450               |
|                        | <i>Mus musculus</i>              | O35216               |
|                        | <i>Cricetulus griseus</i>        | Q8R565               |
|                        | <i>Bos taurus</i>                | P49449               |
| <b>S5B</b>             | <i>Homo sapiens</i>              | P49450               |
|                        | <i>Xenopus laevis</i>            | Q569M3               |
|                        | <i>Saccharomyces cerevisiae</i>  | P36012               |
|                        | <i>Schizosaccharomyces pombe</i> | Q9Y812               |
| <b>F</b>               | <i>Homo sapiens</i>              | Q96H22               |
|                        | <i>Mus musculus</i>              | Q9CZW2               |
|                        | <i>Rattus norvegicus</i>         | Q5U2W4               |
|                        | <i>Bos taurus</i>                | Q32LL9               |
|                        | <i>Canis lupus familiaris</i>    | F1PCB7               |
|                        | <i>Pan troglodytes</i>           | H2QBK6               |
|                        | <i>Oryctolagus cuniculus</i>     | G1SCF8               |
|                        | <i>Macaca mulatta</i>            | G7NR50               |
|                        | <i>Ovis aries</i>                | W5PED9               |
| <i>Cavia porcellus</i> | H0V272                           |                      |

240

241

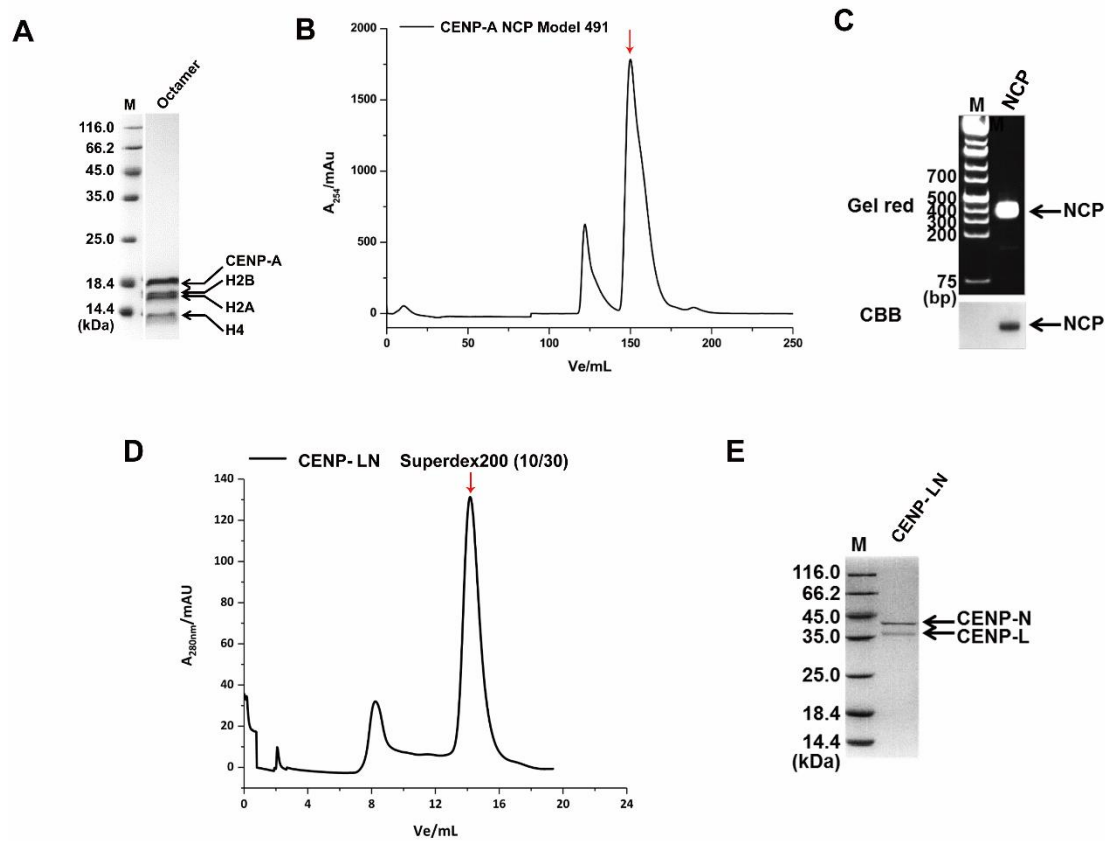

243

244 **Supplementary information, Figure S1. Reconstitution of human CENP-A**  
 245 **nucleosome core particle (NCP) and purification of CENP-LN complex.**

246 (A) Purified (H2A/H2B/CENP-A/H4)<sub>2</sub> octamer by Ni-NTA for CENP-A NCP reconstitution.

247 (B-C) Purification of CENP-A NCP by 5% Native-PAGE in a Model 491 Prep Cell (Bio-Rad  
 248 Laboratories (B), the purified NCP were assessed by Native-PAGE (C).

249 (D-E) SEC result for CENP-LN complex using Superdex200 (10/30) (GE Healthcare) column  
 250 (D), the purified CENP-LN complex were assessed by SDS-PAGE (E).

251 The fraction peaks corresponding to CENP-A NCP and CENP-LN are indicated by red arrows.

252

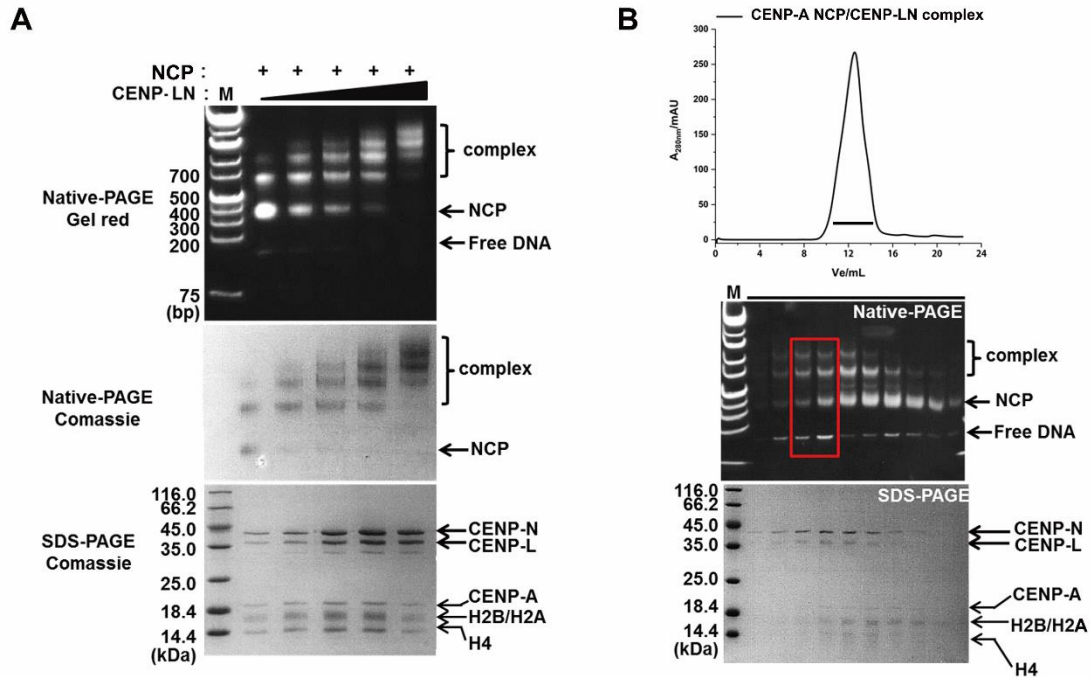

254

255 **Supplementary information, Figure S2. Purification of CENP-A NCP/CENP-LN complex.**

256 (A) Gel shift assays for the interaction between CENP-A NCP and CENP-LN complex.

257 (B) Purification of CENP-A NCP/CENP-LN complex by Superose6 (10/300) (GE Healthcare)

258 column. The fractions were assessed by Native-PAGE and SDS-PAGE and the samples used

259 for cryo-EM were indicated with red rectangle.

260

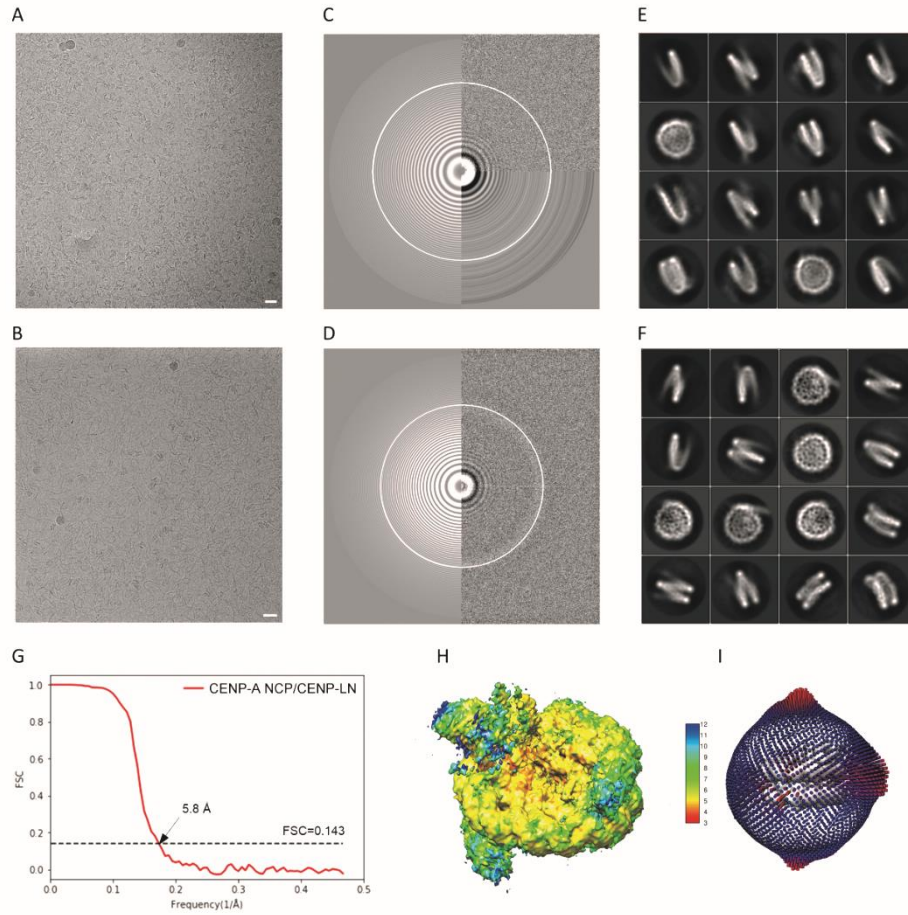

261

262 **Supplementary information, Figure S3. Cryo-EM structure determination and resolution**  
 263 **assessment of CENP-A NCP/CENP-LN complex.**

264 (A-F) Cryo-EM structure determination. Representative micrograph of (A) TF20 and (B) Titan

265 Krios cryo-EM data. (C) CTF estimation of image in (A) by *Gctf* with an estimated image

266 resolution of 3.8 Å. (D) *Ctffind* showed Thon rings in the Fourier spectrum of the image in (B)

267 extending to 1/3.7 Å<sup>-1</sup>. Selected 2D class averages of the sample are shown in (E) for TF20 and

268 (F) for Titan datasets. Scale bar in (A) and (B) is 20 nm. (G-I) Validation of CENP-A

269 NCP/CENP-LN complex structure. (G) "Gold-standard" FSC coefficient curve of the final

270 reconstruction showed an overall resolution of 5.8 Å. (H) Local resolution estimation by

271 *ResMap*<sup>II</sup>. The core region resolution reached about 4.5 Å. (I) Orientation distribution for

272 particles included in the final reconstruction.

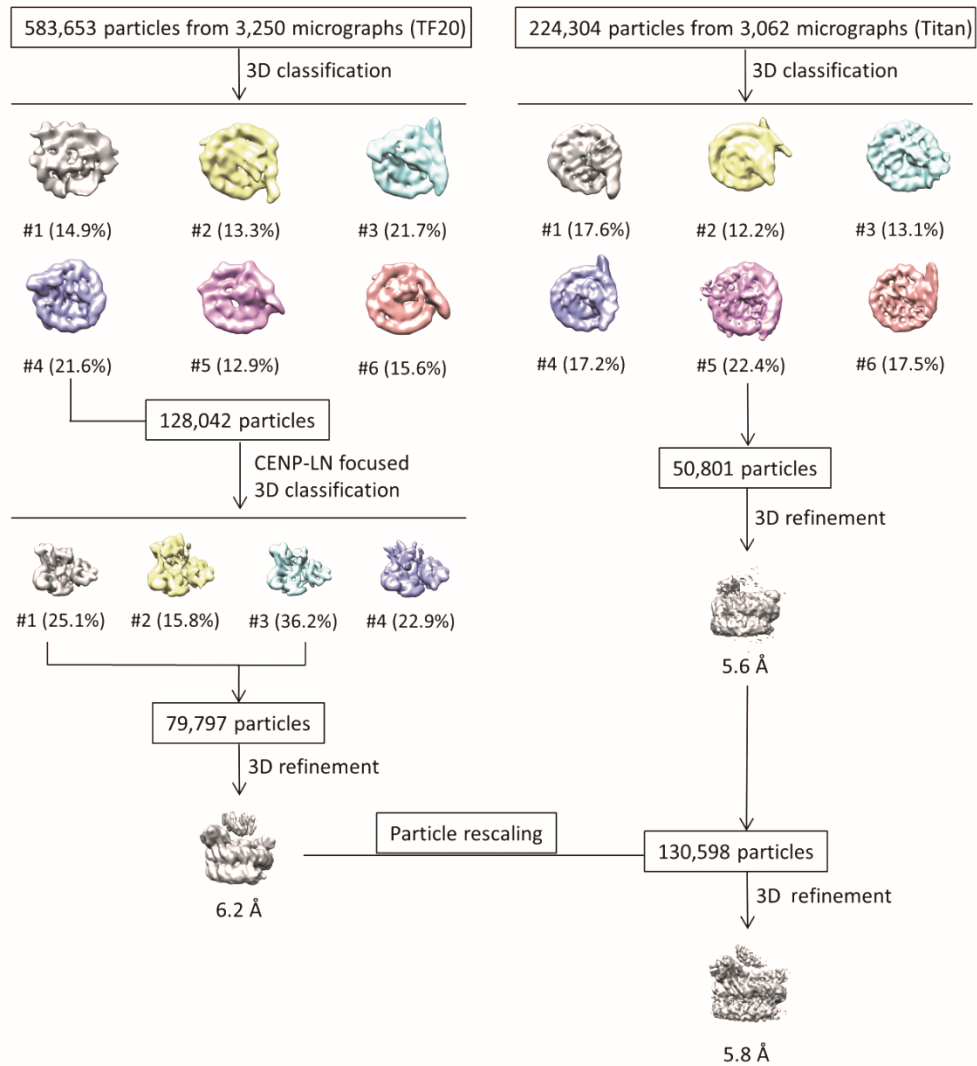

273

274 **Supplementary information, Figure S4. Flow chart of cryo-EM data processing.**

275 TF20 and Titan Krios data were first separately processed and then combined to generate the  
 276 final reconstruction. For both datasets particles were picked and sorted, and subjected to 2D  
 277 classifications in *Relion*. Good particles were further processed by 3D analysis. For the TF20  
 278 data an additional 3D classification that focused on CENP-LN density and skipped alignment  
 279 was carried out. Before combination, particles from TF20 were rescaled to match those from  
 280 the Titan Krios.

281



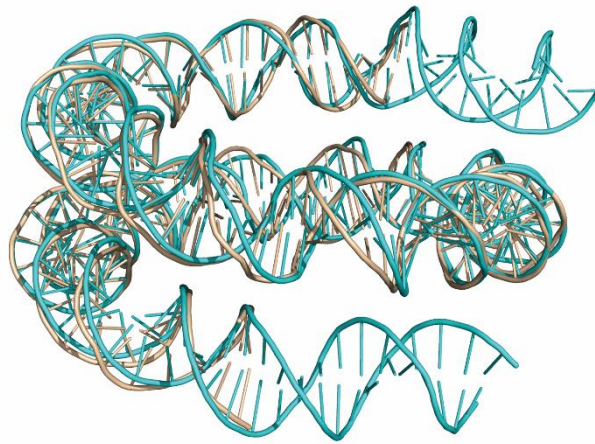

— CENP-A NCP/CENP-LN (cryo-EM)  
— CENP-A NCP(PDB ID:3AN2)

282

283 **Supplementary information, Figure S5.** Superposition of the nucleosomal DNA (cyan) from

284 our cryo-EM structure of CENP-A NCP/CENP-LN complex and the previously reported crystal

285 structure of CENP-A nucleosome (wheat, PDB ID: 3AN2).

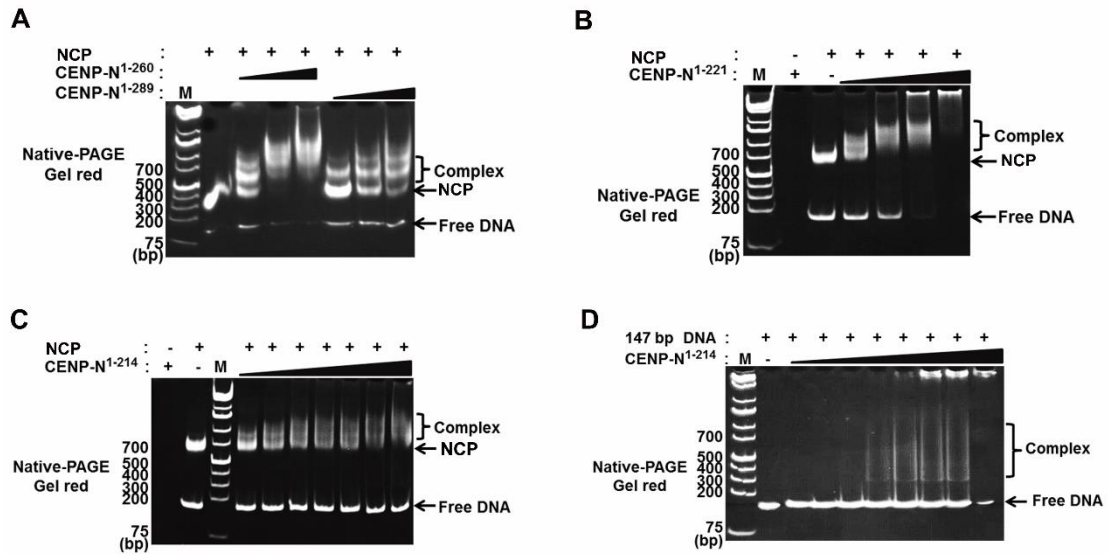

286

287 **Supplementary information, Figure S6. Interactions between CENP-A NCP and CENP-**  
 288 **N truncations.**

289 (A-C) Native-PAGE results of the binding of CENP-A NCP by (A) CENP-N<sup>1-260</sup>, CENP-N<sup>1-289</sup>,  
 290 (B) CENP-N<sup>1-221</sup> and (C) CENP-N<sup>1-214</sup>.

291 (D) Native-PAGE result of the interaction between 147 bp DNA and CENP-N<sup>1-214</sup>. The bands  
 292 corresponding to free DNA, free NCP and the complex formed by NCP or DNA with CENP-N  
 293 are labeled.

294

295

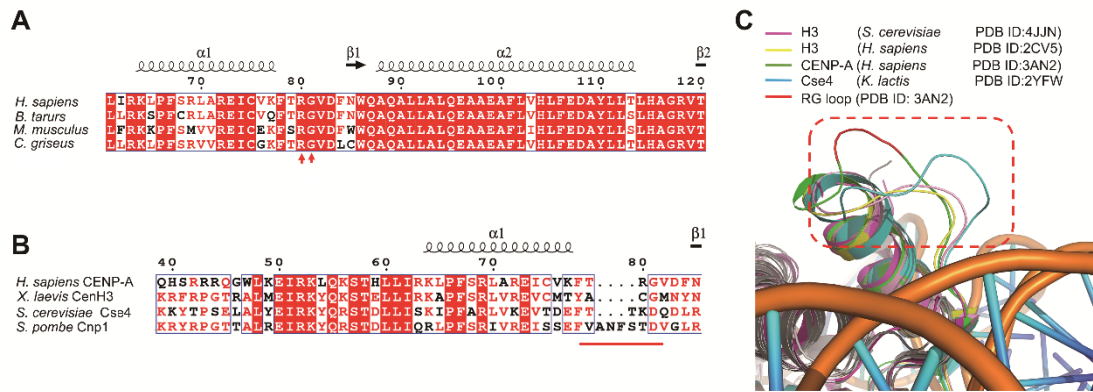

296

297 **Supplementary information, Figure S7. Comparison of the sequences and structures of**  
298 **CENP-A RG loops from different species.**

299 (A-B) Sequence alignments of human CENP-A against its orthologous from (A) higher  
300 mammal species, (B) *Xenopus laevis* and yeast. the RG loop region is highlighted with red  
301 arrows in (A) and red line in (B). The UniProt entries of the CENP-A orthologous used for  
302 sequence alignment are listed in Table S1.

303 (C) Structural comparison of the RG loop (red) in human CENP-A (green) and its  
304 corresponding regions in human H3 (yellow), *S. cerevisiae* H3 (pink) and *Kluyveromyces lactis*  
305 Cse4 (cyan).

306

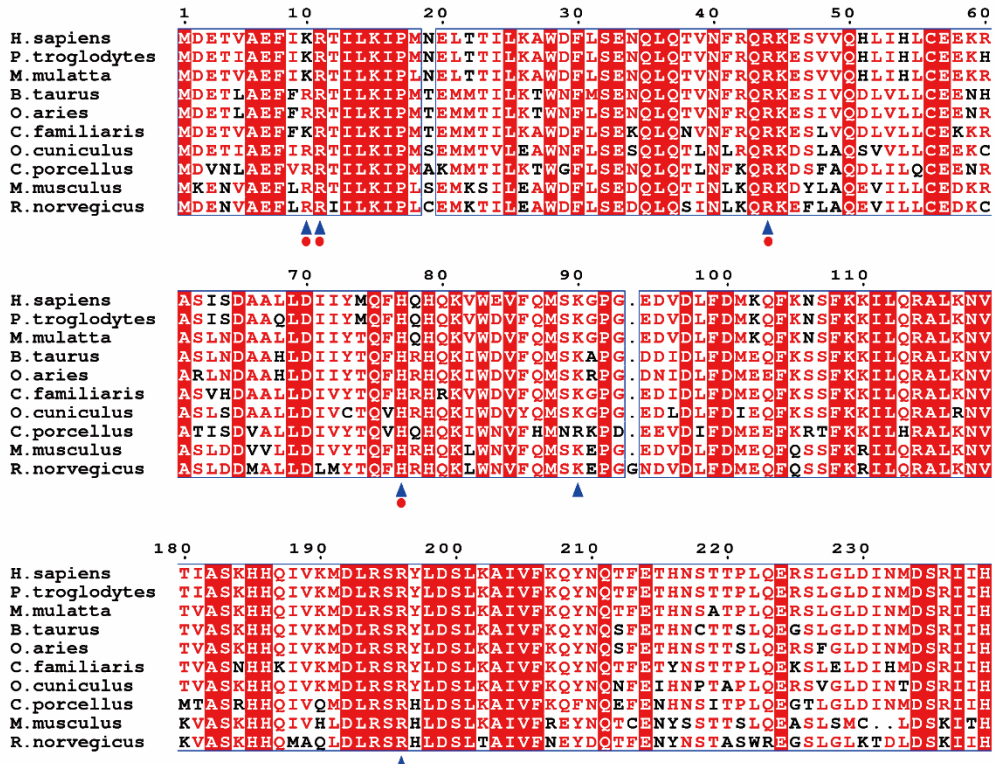

307

308 **Supplementary information, Figure S8. Sequence alignments of human CENP-N against**  
309 **its orthologous.**

310 The key residues identified to be essential for CENP-A NCP and nucleosomal DNA binding are  
311 indicated with blue triangle and red dots, respectively. The UniProt entries of the CENP-N  
312 orthologous used for sequence alignment are listed in Table S1.

313

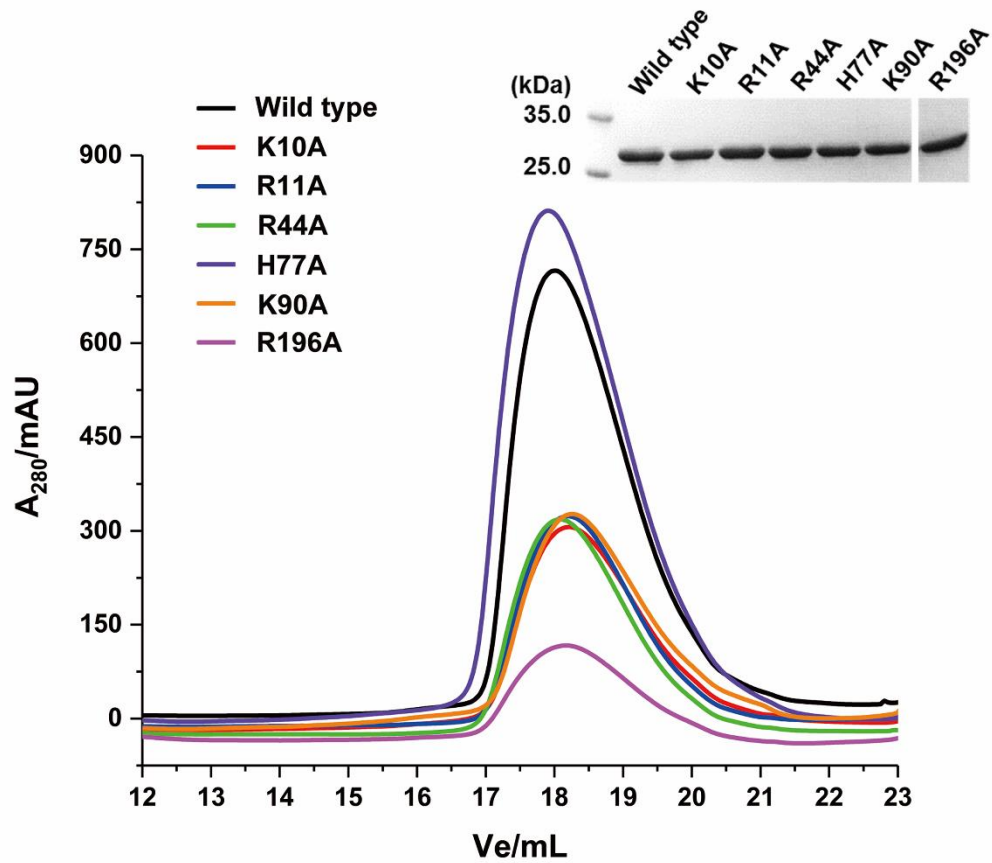

314

315 **Supplementary information, Figure S9. Purification of CENP-N<sup>1-214</sup> variants.**

316 Purification of wild type CENP-N<sup>1-214</sup> and its mutants using Superdex200 (10/300) increase

317 (GE Healthcare) column. The peaks corresponding to CENP-N<sup>1-214</sup> variants were analyzed by

318 SDS-PAGE.

319

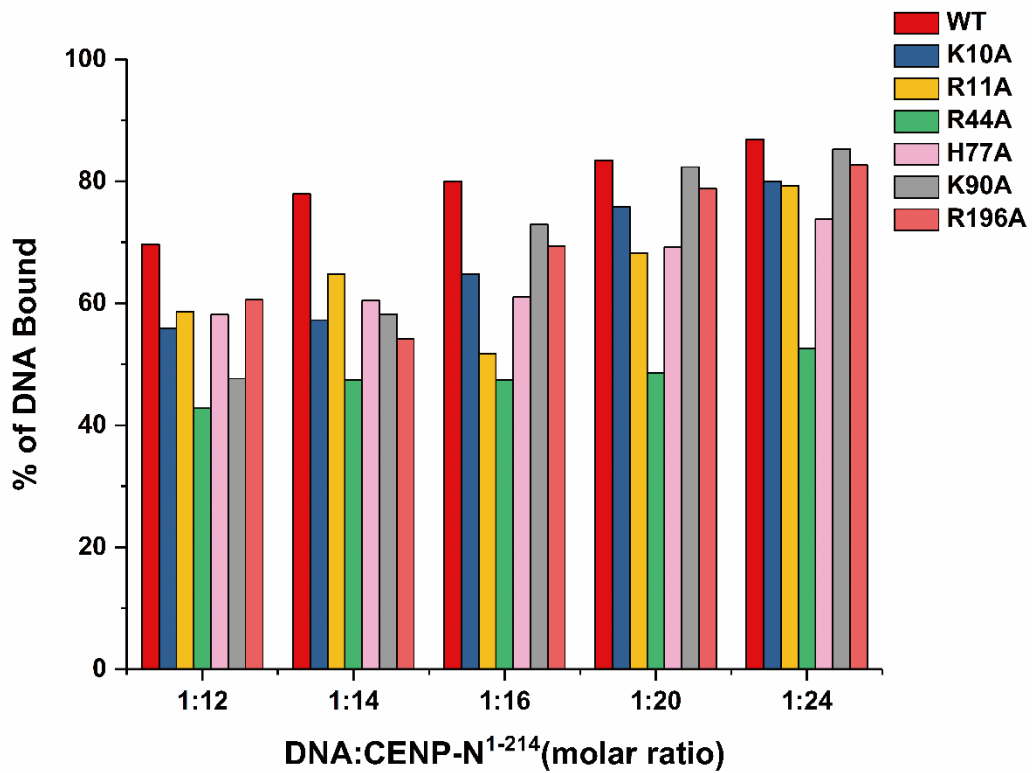

320

321 **Supplementary information, Figure S10. Quantification of percentage of DNA bound to**

322 **CENP-N<sup>1-214</sup> WT and mutants relative to Figure 1G.**

323 The band intensity was quantified by using ImageJ (<https://imagej.nih.gov/ij/index.html>).

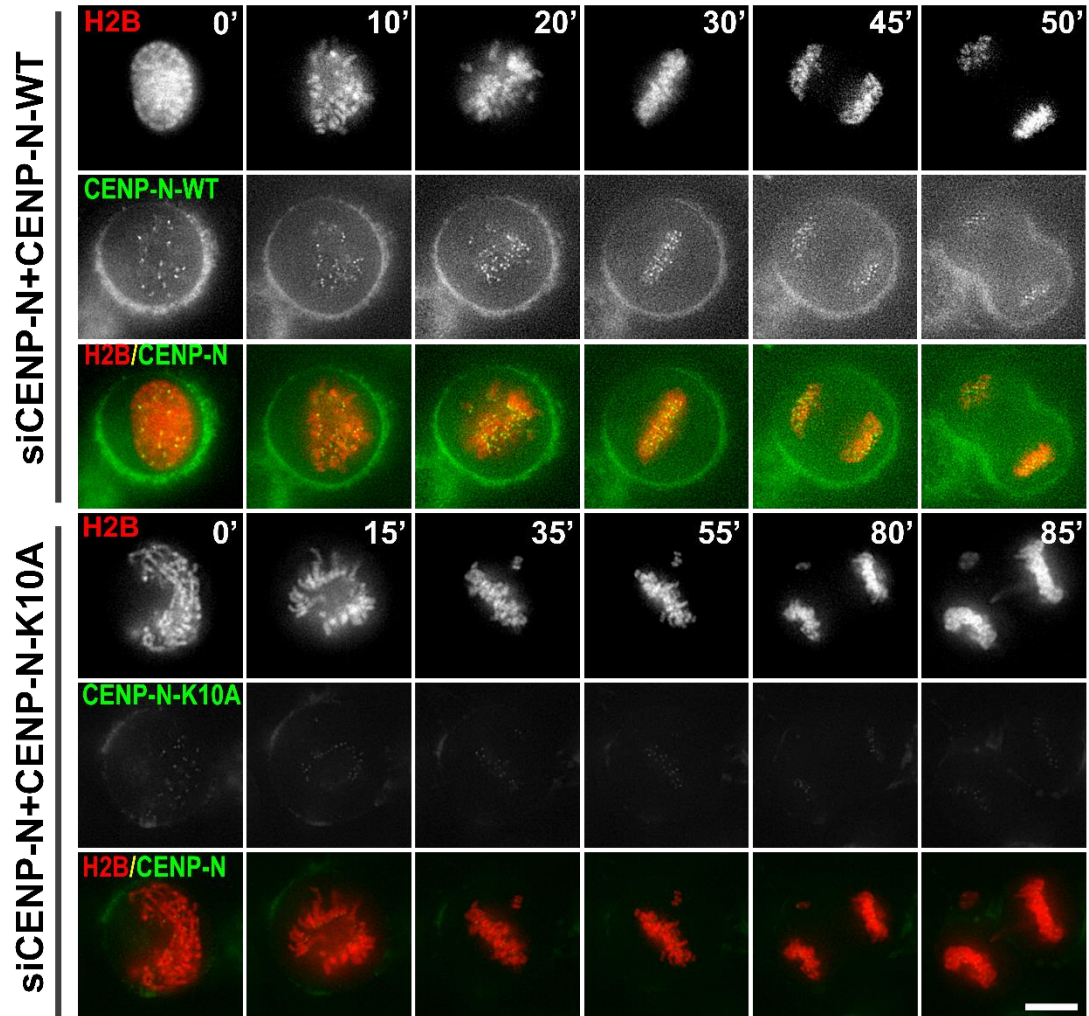

324

325 **Supplementary information, Figure S11. Accurate chromosome segregation in mitosis**  
 326 **requires CENP-N DNA-binding activity.**

327 Representative mitotic phenotypes in HeLa cells coexpressing CENP-N siRNA and RNAi-  
 328 resistant GFP-CENP-N-WT or GFP-CENP-N-K10A shown by time-lapse microscopy.

329 Chromosomes were visualized by cotransfecting HeLa cells with mCherry-H2B. Scale bar, 10

330  $\mu\text{m}$ .

331



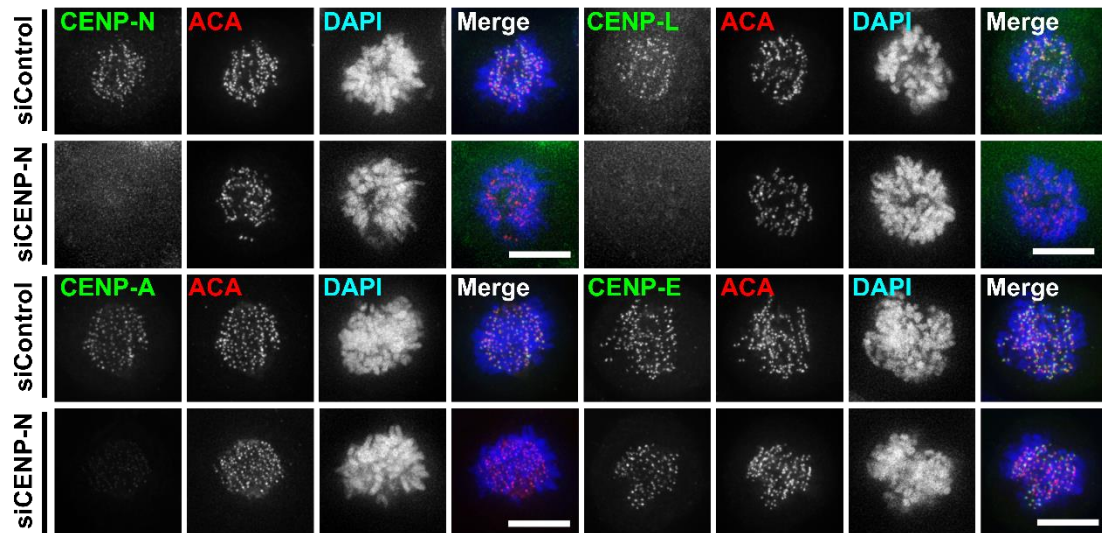

332

333 **Supplementary information, Figure S12. Centromere localization of CCAN components**  
 334 **is dependent on CENP-N.**

335 HeLa cells expressing CENP-N siRNA were fixed and immunostained with CENP-N, CENP-  
 336 L, CENP-A, CENP-E antibodies, respectively. ACA, anti-centromere antibodies. DNA was  
 337 stained by DAPI. Scale bars, 10  $\mu$ m.

338
